# Supplementary material for: Selective Chemical Activation of Piezo1 in Leukemia Cell Membrane: Single Channel Analysis
Source: MDPI journal article supplement (doi:10.3390/ijms22157839), 2021-07-22
Supplement: s1 [file s1]

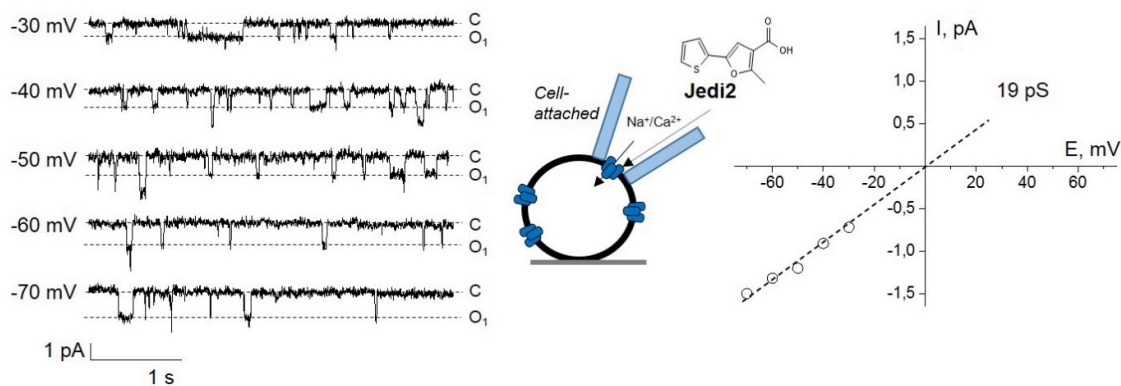

**Figure S1.** Single channel activity of Piezo1 induced by selective channel activator Jedi2 (6  $\mu\text{M}$  in the pipette solution); current records at different membrane potentials from representative cell-attached experiment (out of 3) on K562 cells. The I-V relationship corresponds to single channel conductance of 19 pS.

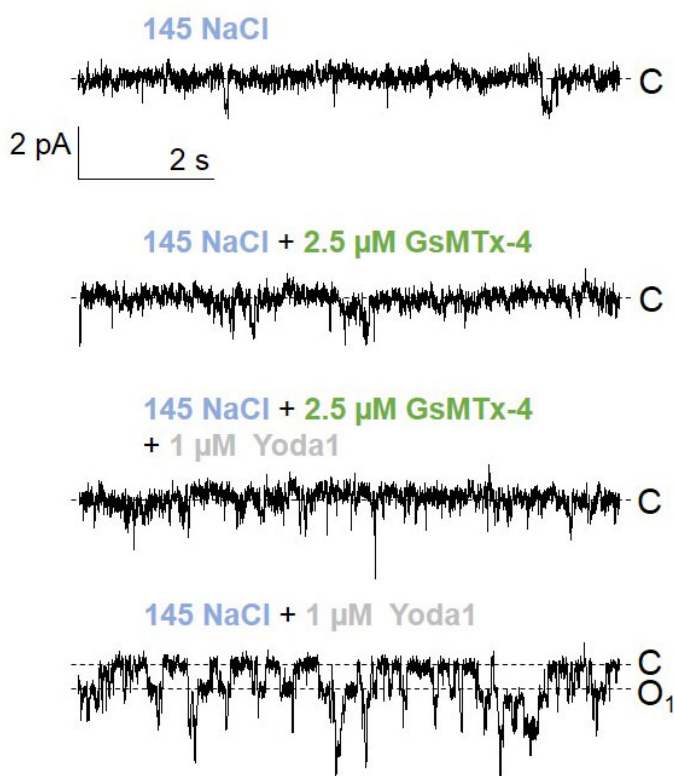

**Figure S2.** Peptide toxin GsMTx4 prevented Piezo1 activation by Yoda1 in plasma membrane of K562 cells. Representative whole-cell recordings at step-by-step substitutions of extracellular bath solution. No channel activity was observed in the simultaneous presence of GsMTx4 and Yoda1 whereas following washout of the toxin with Yoda1-containing standard extracellular solution induced the activation of Piezo1 channels in the membrane. Holding membrane potential is -40 mV.
